# Supplementary material for: Toxic Elements in Beans from Zhejiang, Southeast China: Distribution and Probabilistic Health Risk Assessment
Source: MDPI journal article supplement (doi:10.3390/foods12173300), 2023-09-02
Supplement: s1 [file s1]

## Supplemental tables

Table S1. The spearman correlation of multiple elements in all beans

|    | <b>Cd</b> | <b>Pb</b> | <b>Cr</b> | <b>Hg</b> | <b>As</b> |
|----|-----------|-----------|-----------|-----------|-----------|
| Cd | 1         |           |           |           |           |
| Pb | 0.399     | 1         |           |           |           |
| Cr | 0.128     | 0.213     | 1         |           |           |
| Hg | 0.068     | 0.292     | 0.103     | 1         |           |
| As | 0.524     | 0.240     | 0.026     | -0.014    | 1         |

Table S2. The spearman correlation of multiple elements in broad beans

|    | <b>Cd</b> | <b>Pb</b> | <b>Cr</b> | <b>Hg</b> | <b>As</b> |
|----|-----------|-----------|-----------|-----------|-----------|
| Cd | 1         |           |           |           |           |
| Pb | 0.241     | 1         |           |           |           |
| Cr | 0.024     | 0.039     | 1         |           |           |
| Hg | 0.090     | 0.133     | 0.227     | 1         |           |
| As | 0.338     | 0.100     | -0.138    | 0.094     | 1         |

Table S3. The spearman correlation of multiple elements in black beans

|    | <b>Cd</b> | <b>Pb</b> | <b>Cr</b> | <b>Hg</b> | <b>As</b> |
|----|-----------|-----------|-----------|-----------|-----------|
| Cd | 1         |           |           |           |           |
| Pb | 0.371     | 1         |           |           |           |
| Cr | 0.110     | 0.240     | 1         |           |           |
| Hg | 0.043     | 0.370     | 0.102     | 1         |           |
| As | 0.720     | 0.349     | 0.017     | -0.027    | 1         |

Table S4. The spearman correlation of multiple elements in red beans

|    | <b>Cd</b> | <b>Pb</b> | <b>Cr</b> | <b>Hg</b> | <b>As</b> |
|----|-----------|-----------|-----------|-----------|-----------|
| Cd | 1         |           |           |           |           |
| Pb | 0.332     | 1         |           |           |           |
| Cr | 0.220     | 0.305     | 1         |           |           |
| Hg | 0.182     | 0.338     | 0.685     | 1         |           |
| As | 0.063     | 0.701     | 0.019     | -0.070    | 1         |

Table S5. The spearman correlation of multiple elements in soybeans

|    | <b>Cd</b> | <b>Pb</b> | <b>Cr</b> | <b>Hg</b> | <b>As</b> |
|----|-----------|-----------|-----------|-----------|-----------|
| Cd | 1         |           |           |           |           |
| Pb | 0.308     | 1         |           |           |           |
| Cr | 0.127     | 0.338     | 1         |           |           |
| Hg | 0.032     | 0.444     | 0.051     | 1         |           |
| As | 0.178     | 0.238     | 0.076     | 0.154     | 1         |

Table S6. The spearman correlation of multiple elements in mung beans

|    | <b>Cd</b> | <b>Pb</b> | <b>Cr</b> | <b>Hg</b> | <b>As</b> |
|----|-----------|-----------|-----------|-----------|-----------|
| Cd | 1         |           |           |           |           |
| Pb | 0.792     | 1         |           |           |           |
| Cr | 0.310     | 0.512     | 1         |           |           |
| Hg | 0.050     | 0.251     | 0.346     | 1         |           |
| As | 0.114     | 0.138     | -0.142    | 0.035     | 1         |

Table S7. The spearman correlation of multiple elements in peas

|    | <b>Cd</b> | <b>Pb</b> | <b>Cr</b> | <b>Hg</b> | <b>As</b> |
|----|-----------|-----------|-----------|-----------|-----------|
| Cd | 1         |           |           |           |           |
| Pb | 0.438     | 1         |           |           |           |
| Cr | 0.078     | 0.183     | 1         |           |           |
| Hg | 0.077     | 0.009     | 0.118     | 1         |           |
| As | 0.007     | 0.251     | 0.084     | -0.062    | 1         |

Table S8. The spearman correlation of multiple elements in kidney beans

|    | <b>Cd</b> | <b>Pb</b> | <b>Cr</b> | <b>Hg</b> | <b>As</b> |
|----|-----------|-----------|-----------|-----------|-----------|
| Cd | 1         |           |           |           |           |
| Pb | 0.934     | 1         |           |           |           |
| Cr | -0.062    | -0.020    | 1         |           |           |
| Hg | 0.746     | 0.592     | 0.027     | 1         |           |
| As | -0.175    | -0.214    | 0.016     | -0.120    | 1         |

Supplemental Table S9. The estimated target hazard quotients (THQs) of elements for different population (Monte Carlo simulation).

|          |      | As   | Cd   | Cr | Hg   | Pb   | Total (sum) |
|----------|------|------|------|----|------|------|-------------|
| Children | Mean |      |      |    |      |      |             |
|          | P50  | 0.10 | 0.30 | 0  | 0.01 | 0.01 | 0.46        |
|          | P70  | 0.14 | 0.47 | 0  | 0.02 | 0.01 | 0.66        |
|          | P95  | 0.25 | 0.88 | 0  | 0.04 | 0.01 | 1.1         |
| Teens    | Mean |      |      |    |      |      |             |
|          | P50  | 0.11 | 0.34 | 0  | 0.01 | 0.01 | 0.5         |
|          | P70  | 0.15 | 0.49 | 0  | 0.02 | 0.01 | 0.68        |
|          | P95  | 0.25 | 0.82 | 0  | 0.04 | 0.01 | 1.05        |
| Adults   | Mean |      |      |    |      |      |             |
|          | P50  | 0.05 | 0.17 | 0  | 0.01 | 0    | 0.26        |
|          | P70  | 0.08 | 0.25 | 0  | 0.01 | 0    | 0.35        |
|          | P95  | 0.13 | 0.42 | 0  | 0.02 | 0.01 | 0.54        |
